# Supplementary material
Source: PubMed Central journal article supplement (PMC2628949)

## **SUPPLEMENTARY FIGURE LEGENDS**

### **Supplementary Figure 1. Suppression of Notch signaling by DBZ in HT29 cells does not result in cell death *in vitro*.**

Human colon cancer cell line HT29 was treated with increasing concentrations of the  $\gamma$ -secretase inhibitor, DBZ, for up to 72 hr. **(A)** The graph depicts the percentages of viable cells as determined by Trypan Blue stain. Comparison was performed by paired 2-tailed *t* test. N = 4. **(B)** The graph depicts the percentages of cells in the sub-G<sub>1</sub> fraction as determined by FACS analysis. Comparison was performed by paired 2-tailed *t* test. N = 4. **(C)** Western blot analysis for cleaved caspase-3 and cleaved PARP. Actin serves as a loading control. The control represents lysates obtained from cells irradiated with 12 Gy of  $\gamma$ -ray.

### **Supplementary Figure 2. The effect of Notch suppression by DBZ in HT29 cells on p27 and p57 levels.**

HT29 cells were treated with increasing concentrations of the  $\gamma$ -secretase inhibitor, DBZ, for up to 72 hr. The levels of p27 and p57 were determined by Western blot analysis as shown. Actin was shown as a loading control.

### **Supplementary Figure 3. Correlation between Notch activity and rate of proliferation of HT29 cells.**

**(A)** HT29 cells were transfected with an empty vector control or an expression construct containing NICD. Rates of proliferation were assessed by counting the number of cells daily. \*  $p < 0.05$ ; and \*\*\*  $p < 0.001$  when compared to control by paired 2-tailed *t* test. N = 4. **(B)** HT29 cells were transfected with scrambled control siRNA or with Notch-specific siRNA. Rates of proliferation were assessed by counting the number of cells daily. \*\*\*  $p < 0.001$  when compared to control by paired 2-tailed *t* test. N = 4.

**Supplementary Figure 4. The mouse *Klf4* promoter contains potential HES1 binding sites.**

The sequence containing 1,000 bp of the 5'-flanking region and the 5'-untranslated region of the mouse *Klf4* gene is shown (1). The initiation site of transcription is identified by an arrow and that of translation in bold letters. The TATA box is identified with a box. The five potential HES1-binding sites are identified by the italic and underlined sequences and include 3 class C, 1 reverse class C and 1 reverse N box sequences (2, 3).

**Supplementary Figure 5. AB/PAS and *Klf4* staining of the small intestines from control and DBZ-treated wild type mice.**

Small intestines obtained from age-matched control (**A** and **B**) and DBZ-treated (**C** and **D**) wild type mice were stained with AB/PAS (**A** and **C**) and *Klf4* (**B** and **D**).

**Supplementary Figure 6. AB/PAS stain of the large intestines from control and DBZ-treated wild type or *Apc*<sup>Min/+</sup> mice.**

Large intestines obtained from control (**A**) and DBZ-treated (**C**) wild type mice, and control (**B**) and DBZ-treated (**D**) *Apc*<sup>Min/+</sup> mice were stained with AB/PAS.

**Supplementary Figure 7. *Klf4* immunostaining of the large intestines from control and DBZ-treated wild type or *Apc*<sup>Min/+</sup> mice.**

Large intestines obtained from control (**A**) and DBZ-treated (**C**) wild type mice, and control (**B**) and DBZ-treated (**D**) *Apc*<sup>Min/+</sup> mice were stained for *Klf4*.

**Supplementary Figure 8. Ki67 immunostaining of the normal-appearing small intestine and adenomas from control and DBZ-treated *Apc*<sup>Min/+</sup> mice.**

Normal-appearing small intestinal tissues (**A** and **C**) and small intestinal adenomas (**B** and **D**) obtained from age-matched control *Apc*<sup>Min/+</sup> mice (**A** and **B**) and DBZ-treated *Apc*<sup>Min/+</sup> mice (**C** and **D**) were immunostained with antibodies against Ki67.

#### **SUPPLEMENTARY REFERENCES**

1. Mahatan CS, Kaestner KH, Geiman DE, Yang VW. Characterization of the structure and regulation of the murine gene encoding gut-enriched Kruppel-like factor (Kruppel-like factor 4). *Nucleic Acids Res* 1999;27:4562-9.
2. Iso T, Kedes L, Hamamori Y. HES and HERP families: multiple effectors of the Notch signaling pathway. *J Cell Physiol* 2003;194:237-55.
3. Murata K, Hattori M, Hirai N, et al. Hes1 directly controls cell proliferation through the transcriptional repression of p27Kip1. *Mol Cell Biol* 2005;25:4262-71.

**A**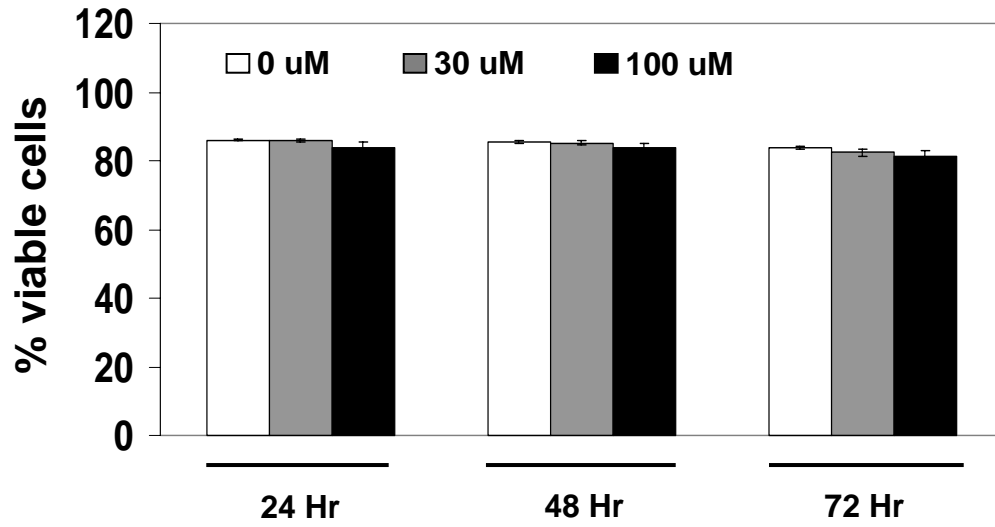**B**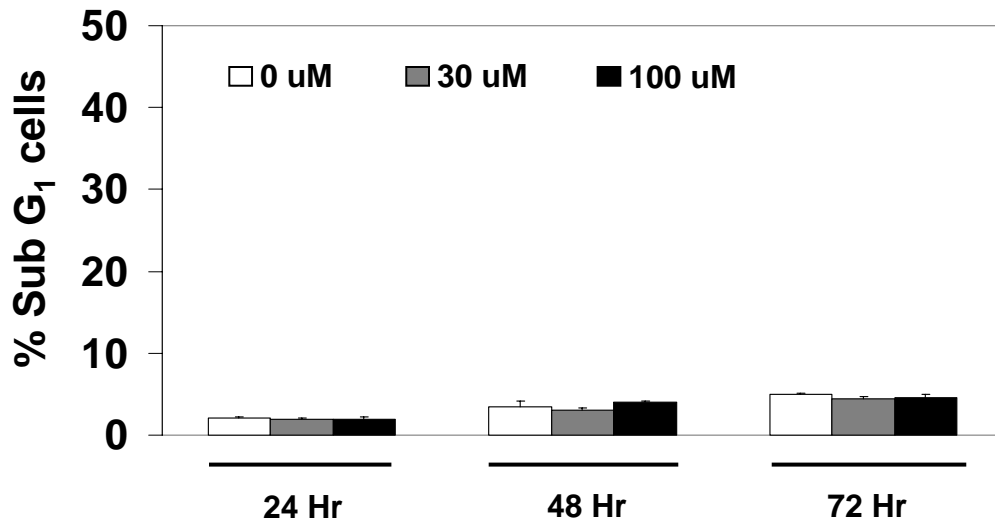**C**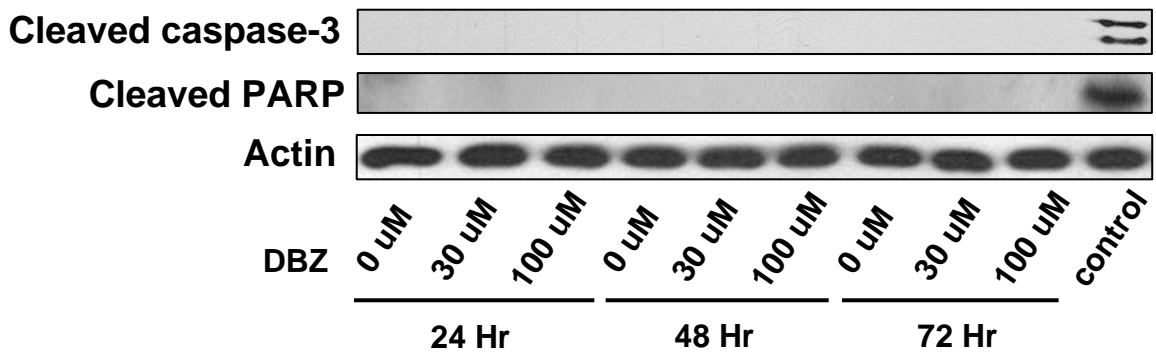

Supplementary Figure 1

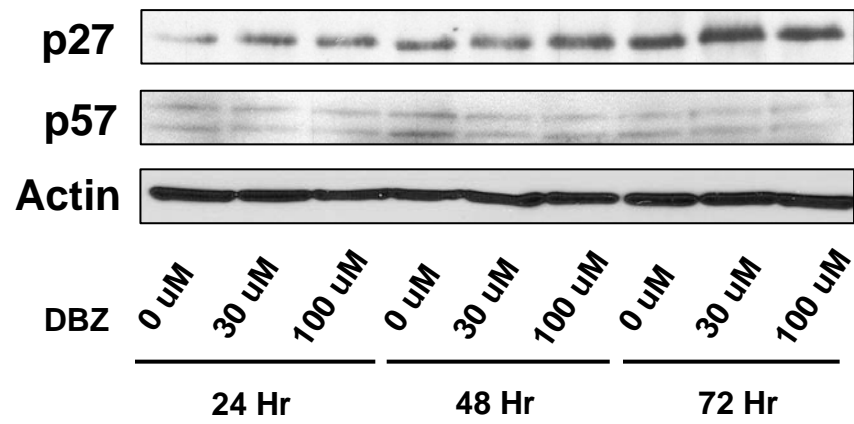

Supplementary Figure 2

**A**

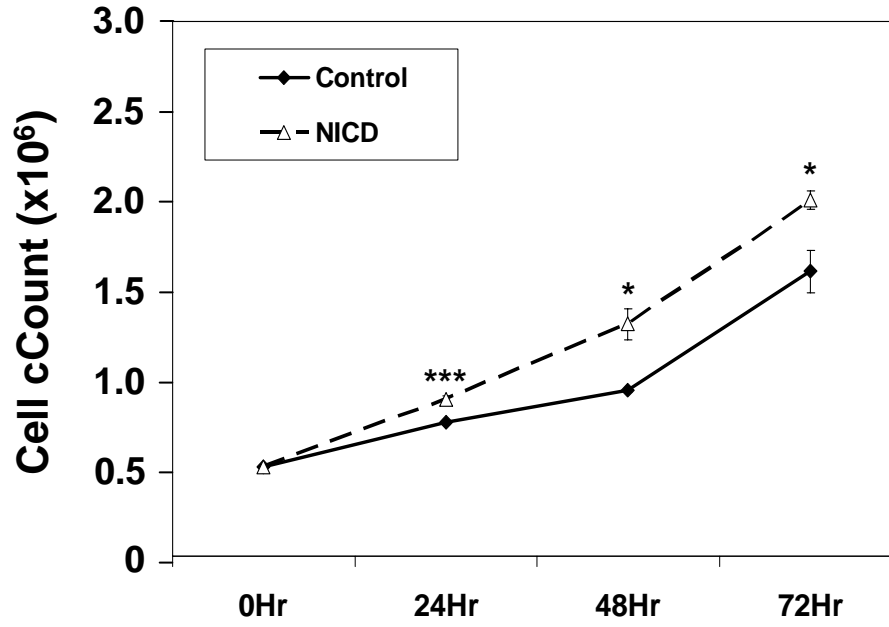

**B**

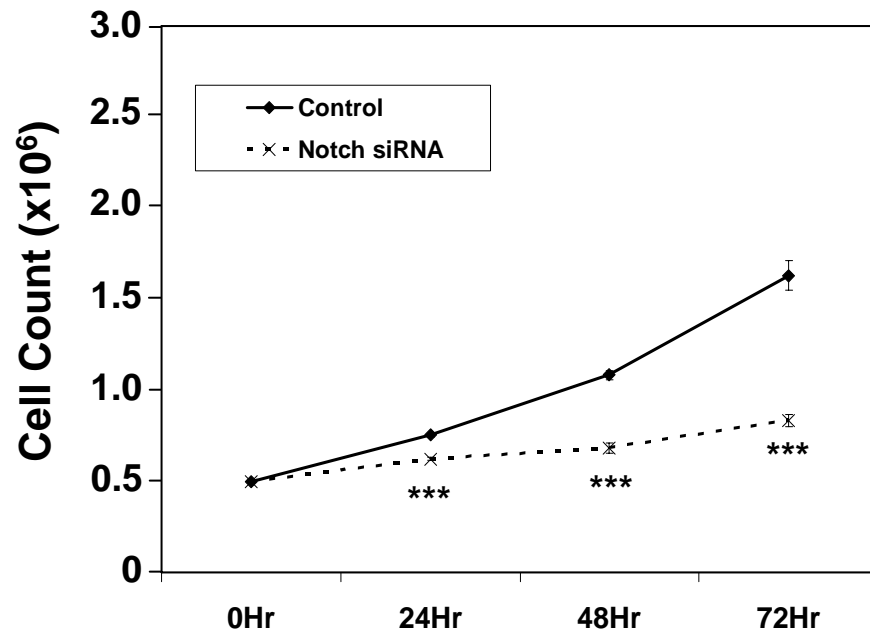

Supplementary Figure 3

-1,000 bp

TGAAGTCCCTTTGAGTGGGTTGGCTAGCTCAGAACCTAAGTTGATGGGAG  
CGAGTTGTCCTATGACCTTTACCTCGCCGCTTCACCTCTTTATGACTCAC  
TTCTCATCTTCAAATGAAGAGTGCAGTGCCTAGCTTGTAAGAGCTTT  
GAGATCCCTGGTGAAAGGTATCTCCGCGCCTCGGTCCCTCTCCGCGTTCC Reverse N box  
CACTCCCCACCCCCAATGTAAATCTGGAACGCCTTCCTTGTTCCCTTCCA  
TTATCAAGATGACTACGTGCCAATCCCGGCCGCTCTCTTTCATAGCAGG  
CGCGGAACCCCTTCTCCTAGCTTCTGAGATTCTAGCGCCCCCCCCCAAT  
CACCCGGCCCTCACCCCCACCCTACGGGAGGCCCACTGGCACCCGCGCC  
AGGCCAGGCCCTGCGCCGACACGGCCCGGCTCTGCGTGCGTATGCGAGA  
GAGGGCGGGCTGGATGAGTCACGCGGATAATCGCGCTCTCGAGTGCGCAG Class C  
ACGACAGGACAAGCGGTACGCGAGCAGGGTAGGGGCGCGCCGCTCTT  
CCCCCCACACACACACACCCCCAACCTCCTGTCCCCCGCCAGGGTTCCC  
GTGGCAGGACTTTCGAGCCCAGGGAACCGACCGTGGCCGCCAGAGGACC  
CCGAGTAGCGCGCCCACGGGAGCCACGCCGTACTCCAGCGCCGGAGCCG Class C  
CCGTGCGCCGCCACCGCCGCGCGGTGAGCACGGCTCCAGCCCGCCAGCTG  
CCTGGCTGGCGTCACGGCCTGGCCCCGCCCGCCCCGCGCCCTCCCTCGC  
CCCCGCCCCCACGTGCGCGGAGTTTGTTTATTTAGCTACCATGGCAACGC Class C  
GCAGTGGGGCTGCGGGAAGGCGGGGAGAAGAAAGGCAGGGGGCGGGGCC  
TGGCGGCGGAGCCCCGCGCGCCGACAGGGAGGAGCGGGGAGCAAGCG  
AGCGAGAAGTTATAAGTAAAGAAGCGCGCGGGCGGCCCGGCAGTTCCCCG  
GCCAAGAGAGCGAGCGCGGCTCCGGGCGCGGGGAGCAGAGGCGGTGGC  
GGGCGGCGGCGGCACCCGGAGCCGCCGAGTGCCCTCCCCGCCCTCCAG  
CCCCCACCAGCAACCCGCCCGTGACCCGCGCCCATGGCCGCGCGACC Reverse Class C  
CGGCACAGTCCCCAGGACTCCGCACCCCGCGCCACCGCCCAGCTCGCAGT  
TCCGCGCCACCGCGGCCATTCTCACCTGGCGGCGCCGCCCGCCCACCGCC  
CGGACCACAGCCCCGCGCCCGGACAGCCACAGTGGCCGCGACAACGGT  
GGGGGACACTGCTGAGTCCAAGAGCGTGCAGCCTGGCCATCGGACCTACT  
TATCTGCCTTGCTGATTGTCTATTTTTTATAAGAGTTTACAACCTTTTCTAA  
GAATTTTTGTATACAAAGGAACTTTTTTAAAGACATCGCCGTTTTATATT  
GAATCCAAAGAAGAAGGATCTCGGGCAATCTGGGGTTTTTGGTTTTGAGGT  
TTTTGTTTTCTAAAGTTTTTAATCTTCGTTGACTTTGGGGCTCAGGTACCCC  
TCTCTCTTCTTCGACTCCGGAGGACCTTCTGGGCCCCACATTAATGAG  
GTAGGTGAGATGTTGGACTTGGGAACAGAAAGGGGTGAGGATTGGAGGGA  
AGCTTCGGAGCAGTGGCCAGGGTGTCCCCTGACTCCTGGTCCCTGTGCGC  
CCCGCCCGGCCCGCAGGCAGCCACCTGGCGAGTCTGAC**ATGG**GCTGTCAGC

Supplementary Figure 4

## Wild Type (Small Intestine)

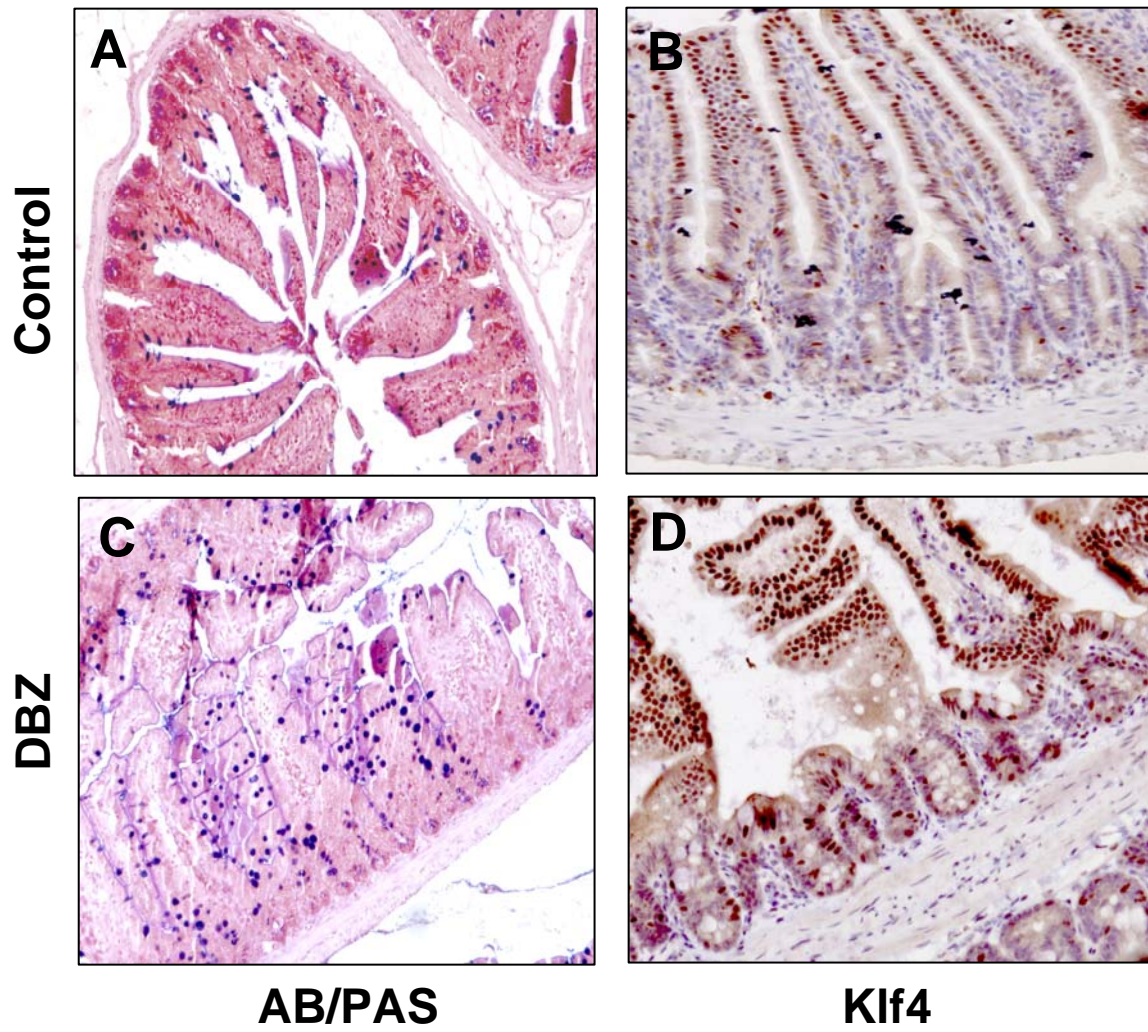



## Large Intestine (AB/PAS)

Wild Type

*Apc*<sup>Min/+</sup>

Control

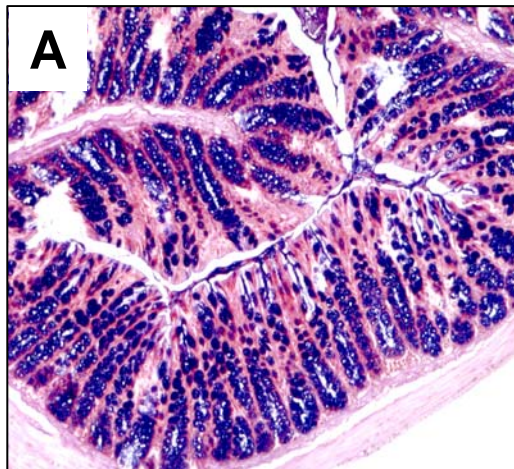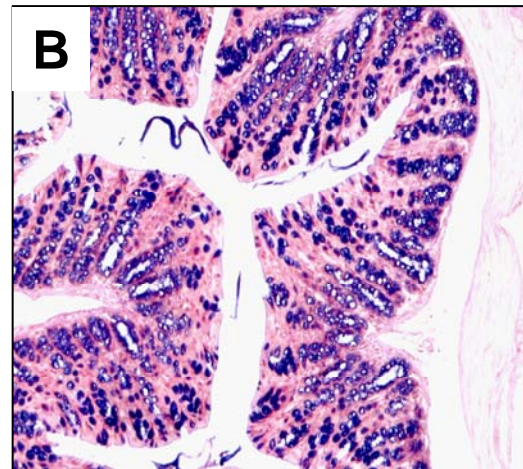

DBZ

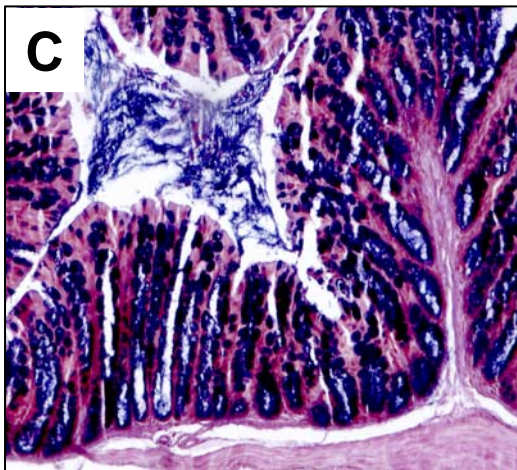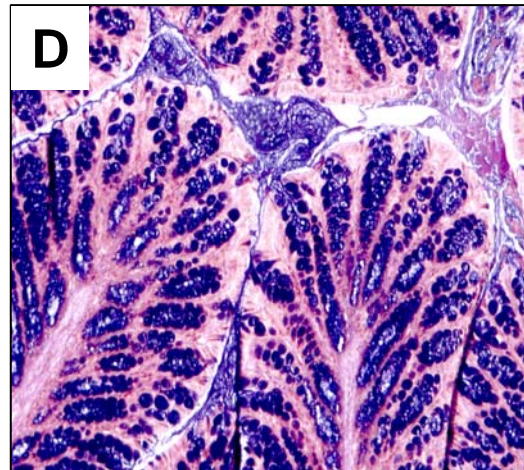

# Large Intestine (Klf4)

Wild Type

*Apc<sup>Min/+</sup>*

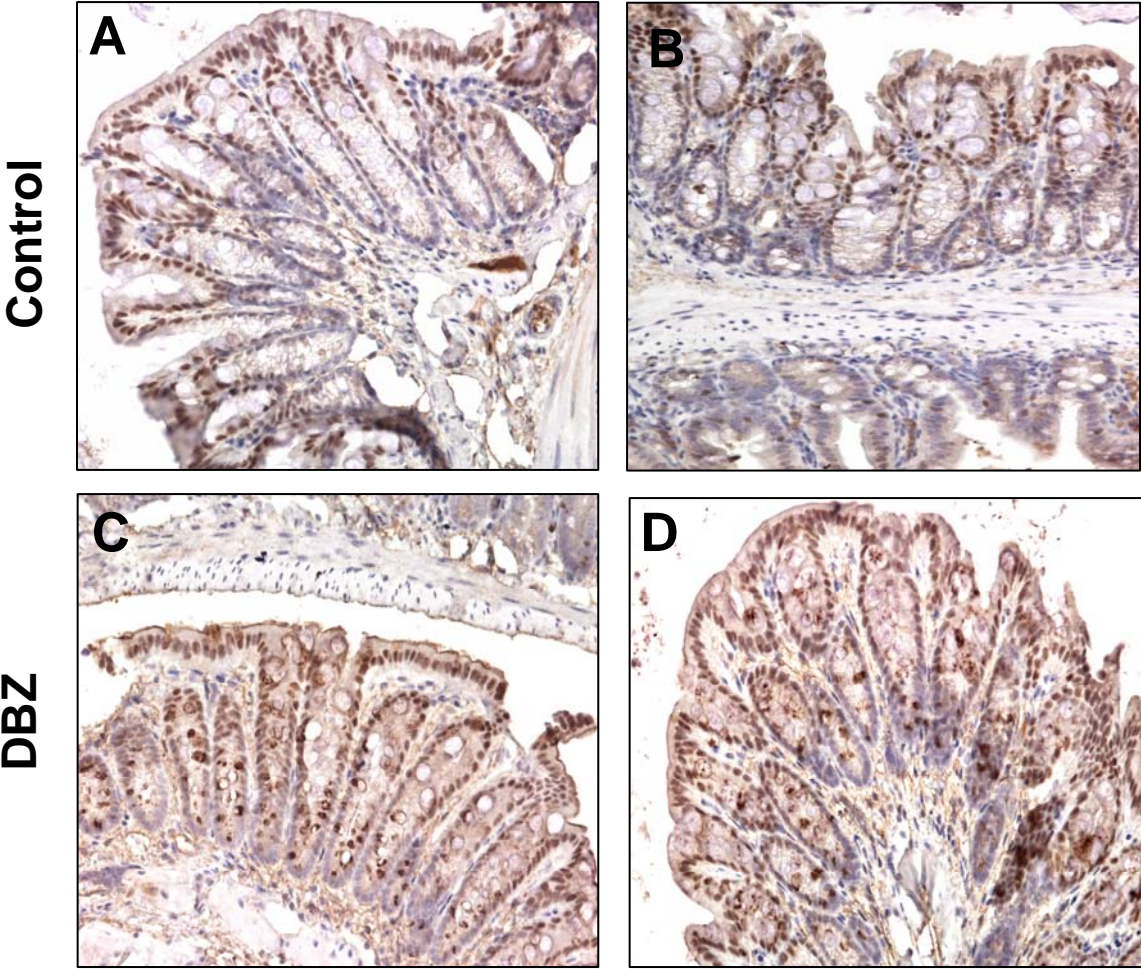

*Apc<sup>Min/+</sup>* (Ki67)

Normal Mucosa

Adenoma

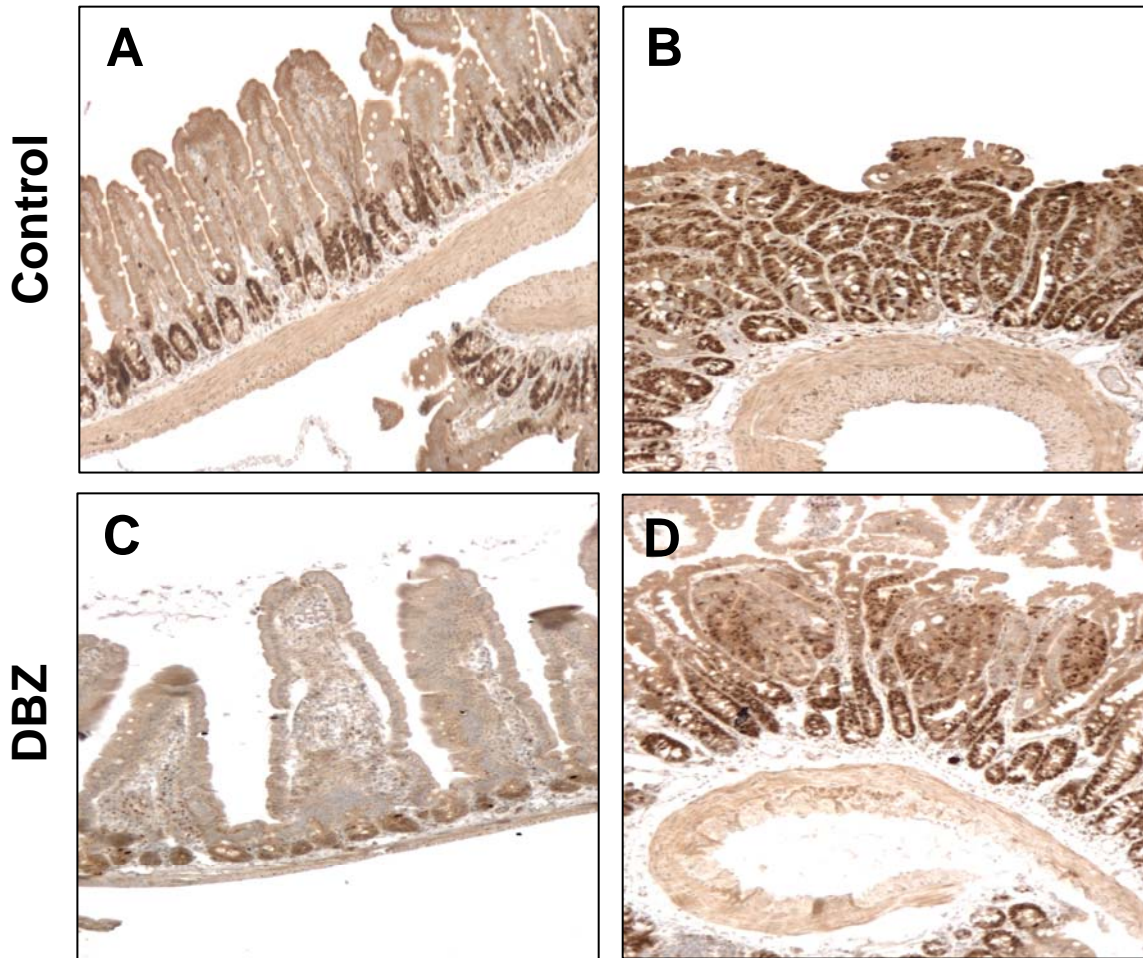

Supplement: NIHMS87321-supplement-Supple_Data.pdf [file NIHMS87321-supplement-Supple_Data.pdf]
